# Supplementary material for: B7-H3 as a Novel CAR-T Therapeutic Target for Glioblastoma
Source: PubMed Central journal article supplement — Mol Ther Oncolytics. 2019 Jul 23;14:279–87. doi: 10.1016/j.omto.2019.07.002 (PMC6713854; doi:10.1016/j.omto.2019.07.002), 2019-07-23
Supplement: mmc1.pdf [file mmc1.pdf]

**OMTO, Volume 14**

## **Supplemental Information**

### **B7-H3 as a Novel CAR-T**

#### **Therapeutic Target**

#### **for Glioblastoma**

**Xin Tang, Shasha Zhao, Yang Zhang, Yuelong Wang, Zongliang Zhang, Meijia Yang, Yanyu Zhu, Guanjie Zhang, Gang Guo, Aiping Tong, and Liangxue Zhou**

**A**

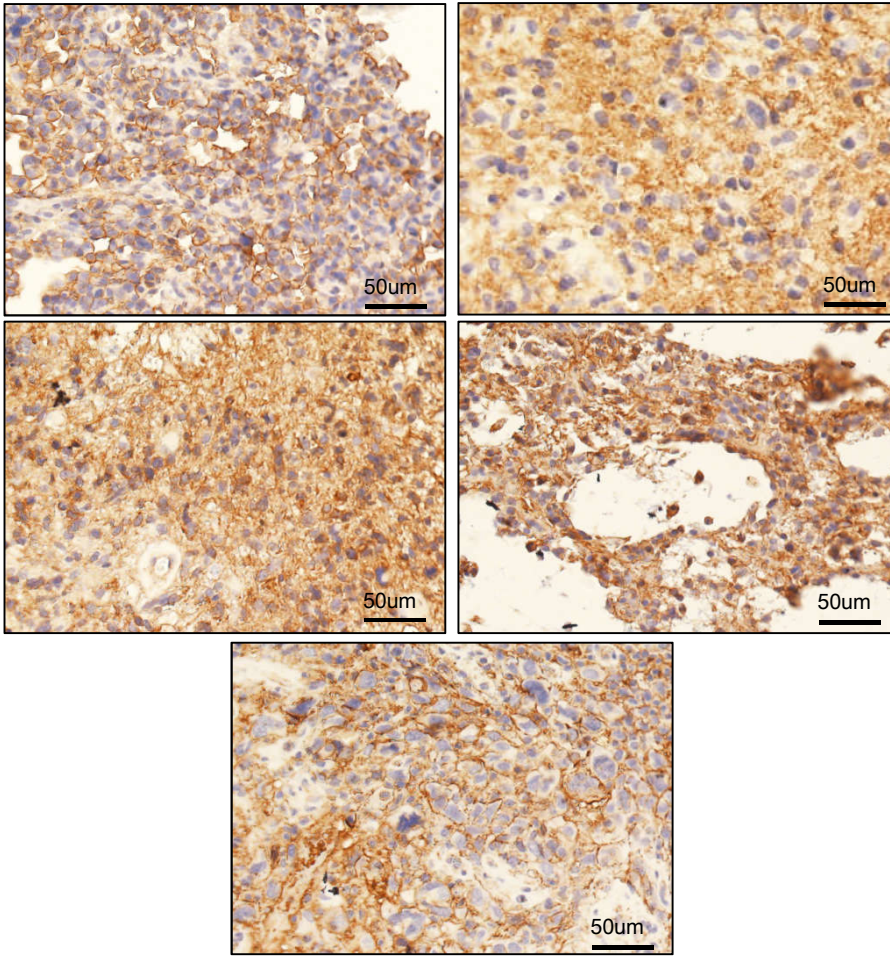

**Glioma tissue**

**B**

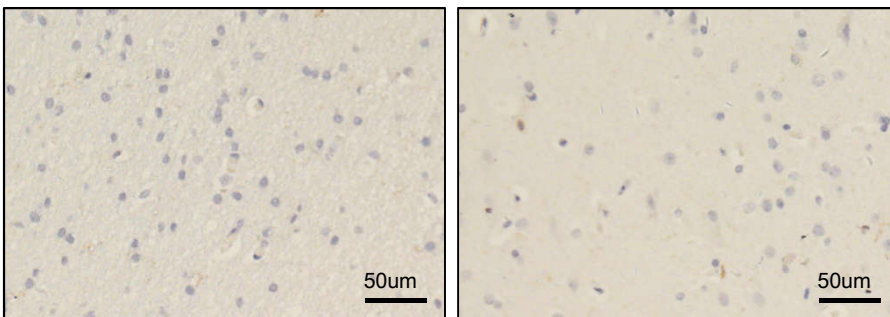

**Normal brain tissues**

Supplemental Figure1. Immunohistochemically analysis (A) Glioma samples strongly stained with B7-H3 was shown. (B) Normal brain tissue samples did not stained with B7-H3
